# Supplementary material for: Opposing Roles of FANCJ and HLTF Protect Forks and Restrain Replication during Stress
Source: PubMed Central journal article supplement — Cell Rep. Author manuscript; Available in PMC 2018 Nov 6. (PMC6218949; doi:10.1016/j.celrep.2018.08.065), 2018-09-18
Supplement: NIHMS1508513-supplement-1.pdf [file NIHMS1508513-supplement-1.pdf]

**Cell Reports, Volume 24**

**Supplemental Information**

**Opposing Roles of FANCD1 and HLF1 Protect**

**Forks and Restrict Replication during Stress**

**Min Peng, Ke Cong, Nicholas J. Panzarino, Sumeet Nayak, Jennifer Calvo, Bin Deng, Lihua  
Julie Zhu, Monika Morocz, Lili Hegedus, Lajos Haracska, and Sharon B. Cantor**

**Supplemental Figures:**

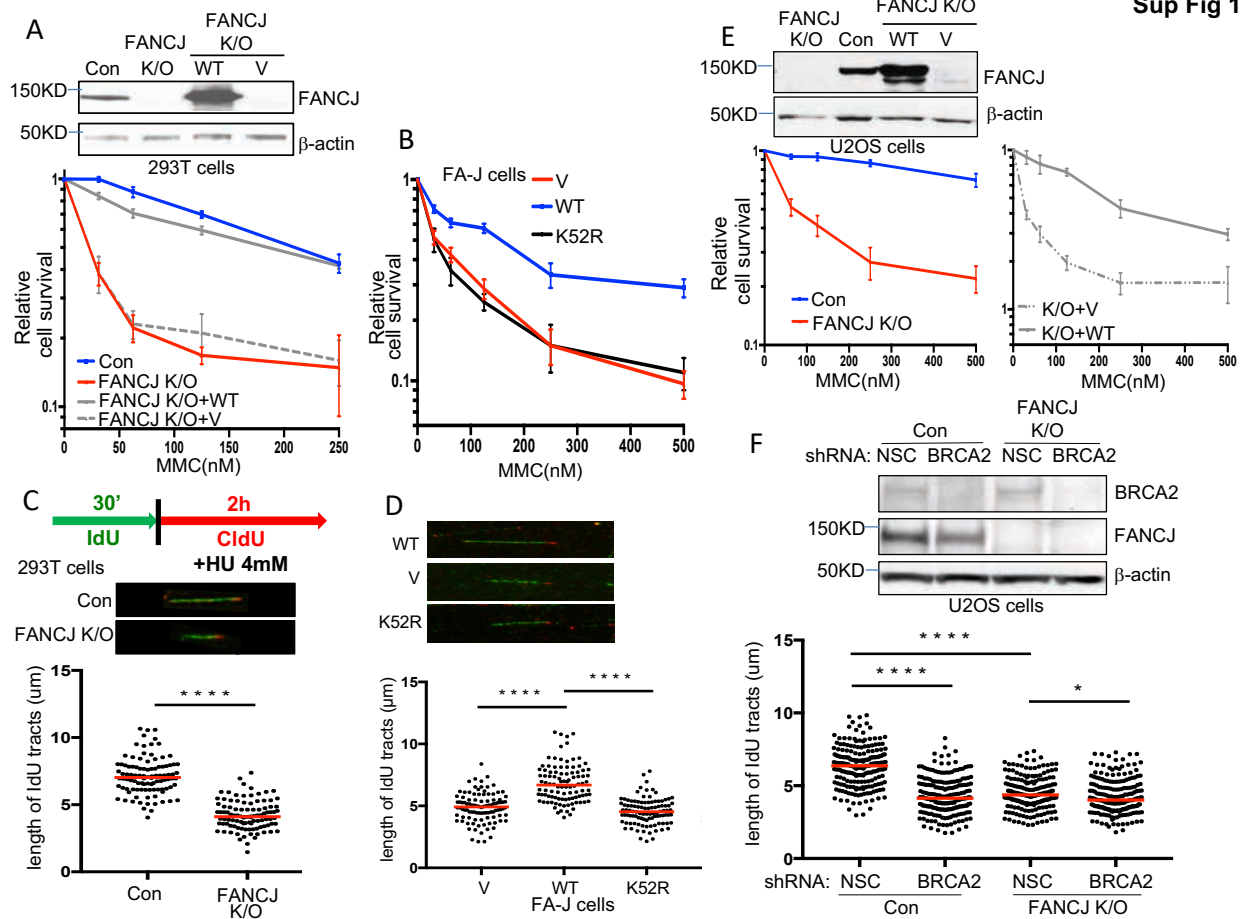

**Figure S1:** FANCJ and its helicase activity protect nascent DNA at replication forks. Related to Figure 1. (A) Western blot analysis with the indicated antibodies (Abs) of lysates from FANCJ K/O, control 293T cells, or FANCJ K/O cells transfected with vector (V) or wild-type FANCJ (WT). Cell survival assay with indicated cells under increasing concentrations of MMC. (B) Cell survival assay with FA-J cells complemented with V, WT or K52R under increasing concentrations of MMC. (C) Schematic, representative images, and quantification of IdU tract length in FANCJ K/O and control 293T cells. (D) Representative images, and quantification of IdU tract length in FANCJ null FA-J cells complemented as noted. For (C) and (D), at least 100 fibers are quantified for each. (E) Western blot analysis with the indicated Abs of lysates from FANCJ K/O, control U2OS cells, or FANCJ K/O cells transfected with V or WT. Cell survival assay with indicated cells under increasing concentrations of MMC. (F) Western blot analysis with the indicated Abs of lysates from FANCJ K/O and control U2OS cells expressing shRNA against BRCA2 or NSC. Quantification of IdU tract length in FANCJ K/O and control U2OS cells with NSC or BRCA2 shRNA. At least 200 fibers are quantified from two independent experiments. Red bars represent the median. Statistical analysis according to two-tailed Mann-Whitney test; \*\*\*\*,  $P < 0.0001$ ; \*,  $P < 0.05$ .

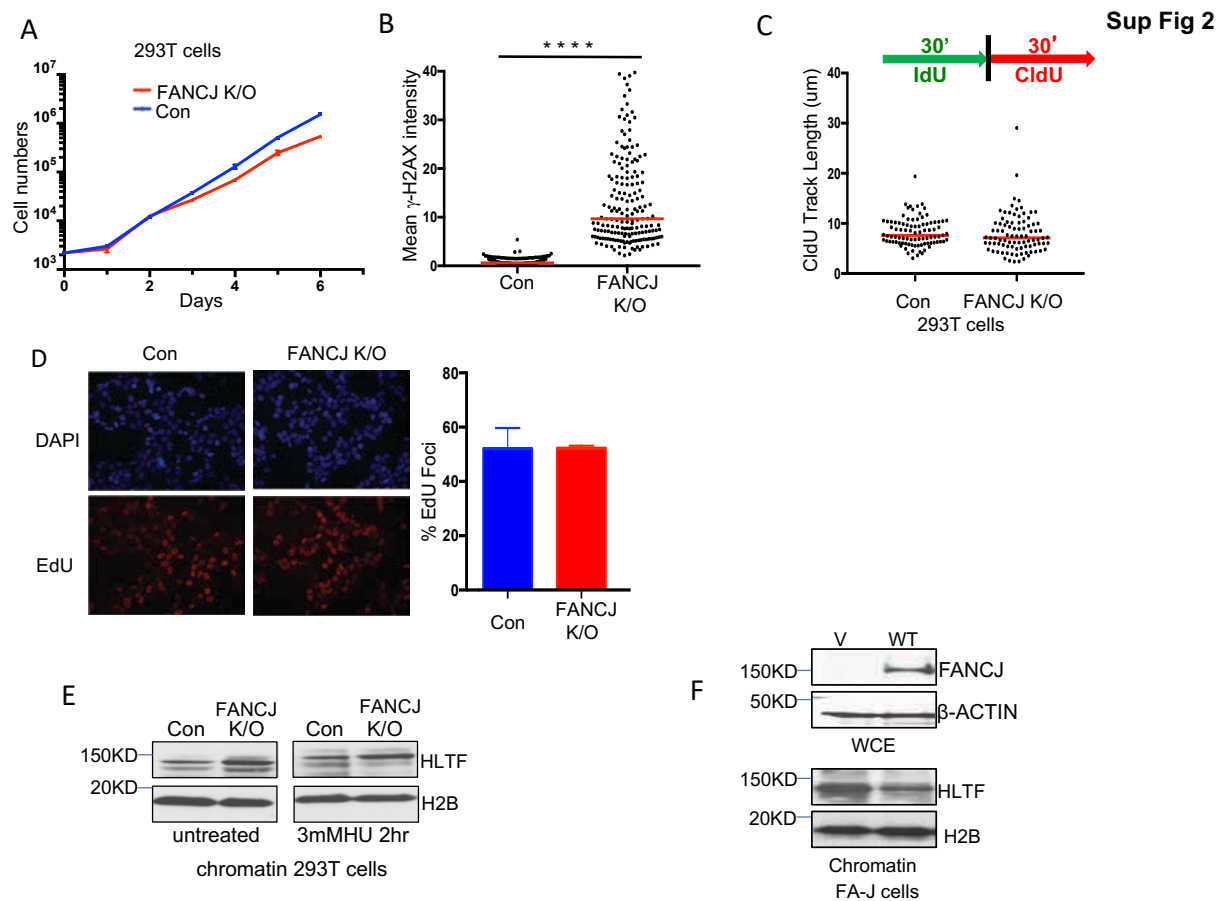

**Figure S2.** FANCD1 loss in 293T cells does not measurably alter replication fork progression in unchallenged conditions but HLTF is enriched in FANCD1 K/O cells with or without HU. Related to Figure 2. (A) Cell growth assay with FANCD1 K/O or control 293T cells plated at low density and counted as indicated. (B) Quantification of  $\gamma$ -H2AX intensity in FANCD1 K/O or control 293T cells. Statistical analysis according to two-tailed Mann-Whitney test; \*\*\*\*,  $P < 0.0001$ . (C) Schematic and quantification of CldU tract length in FANCD1 K/O and control 293T cells. The intensity was measured in at least 150 cells for each. (D) Cells were labeled with EdU and carried out with Click-iT EdU imaging kit. A representative image is shown. The percent of cells with EdU foci was quantified and graphed. Data represent mean  $\pm$  s.d. from three independent experiments. (E) 293T cells were treated with 3mM HU for 2hr or left untreated. Chromatin fractions were analyzed by immunoblotting for the indicated proteins. (F) FA-J cells complemented with WT or V were collected and fractionated, chromatin fractions were analyzed by immunoblotting for the indicated proteins.

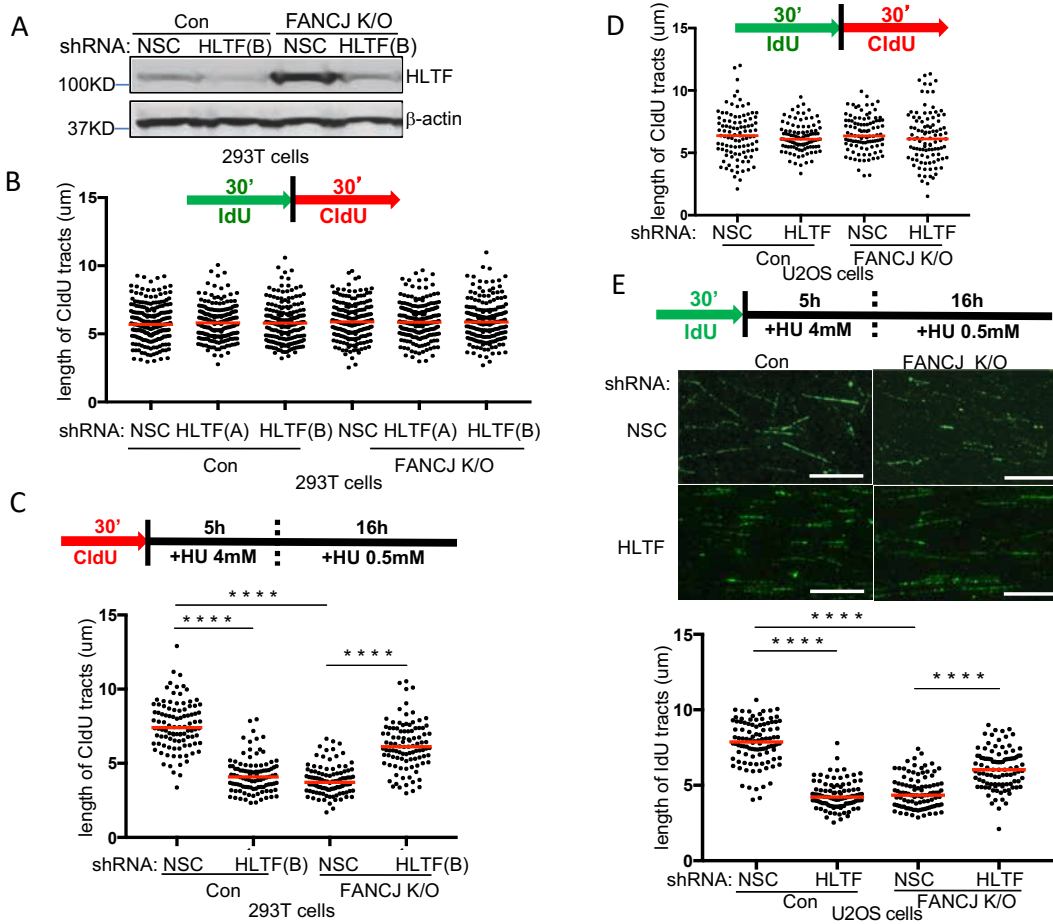

**Figure S3.** HLTF contributes to fork degradation in FANCI K/O 293T cells and under prolonged stress, FANCI contributes to fork degradation in HLTF depleted 293T or U2OS cells. Related to Figure 3. (A) Western blot analysis with the indicated Abs of lysates from control and FANCI K/O 293T cells expressing shRNA against HLTF (reagent B) or non-silencing control (NSC). (B) Schematic and quantification of CldU tract length in 293T untreated cells with shRNA HLTF (reagent A or B). At least 200 fibers are quantified from two independent experiments. (C) Schematic and quantification of CldU tract length after prolonged HU treatment as indicated. (D) Schematic and quantification of CldU tract length in U2OS untreated cells with shRNA HLTF (E) Schematic, representative images and quantification of IdU tract length after prolonged HU treatment as indicated. For (C), (D) and (E), at least 100 fibers are quantified for each. Each dot represents one fiber; red bars represent the median. Statistical analysis according to two-tailed Mann-Whitney test; \*\*\*\*,  $P < 0.0001$ . Scale bar,  $10\mu\text{m}$ .

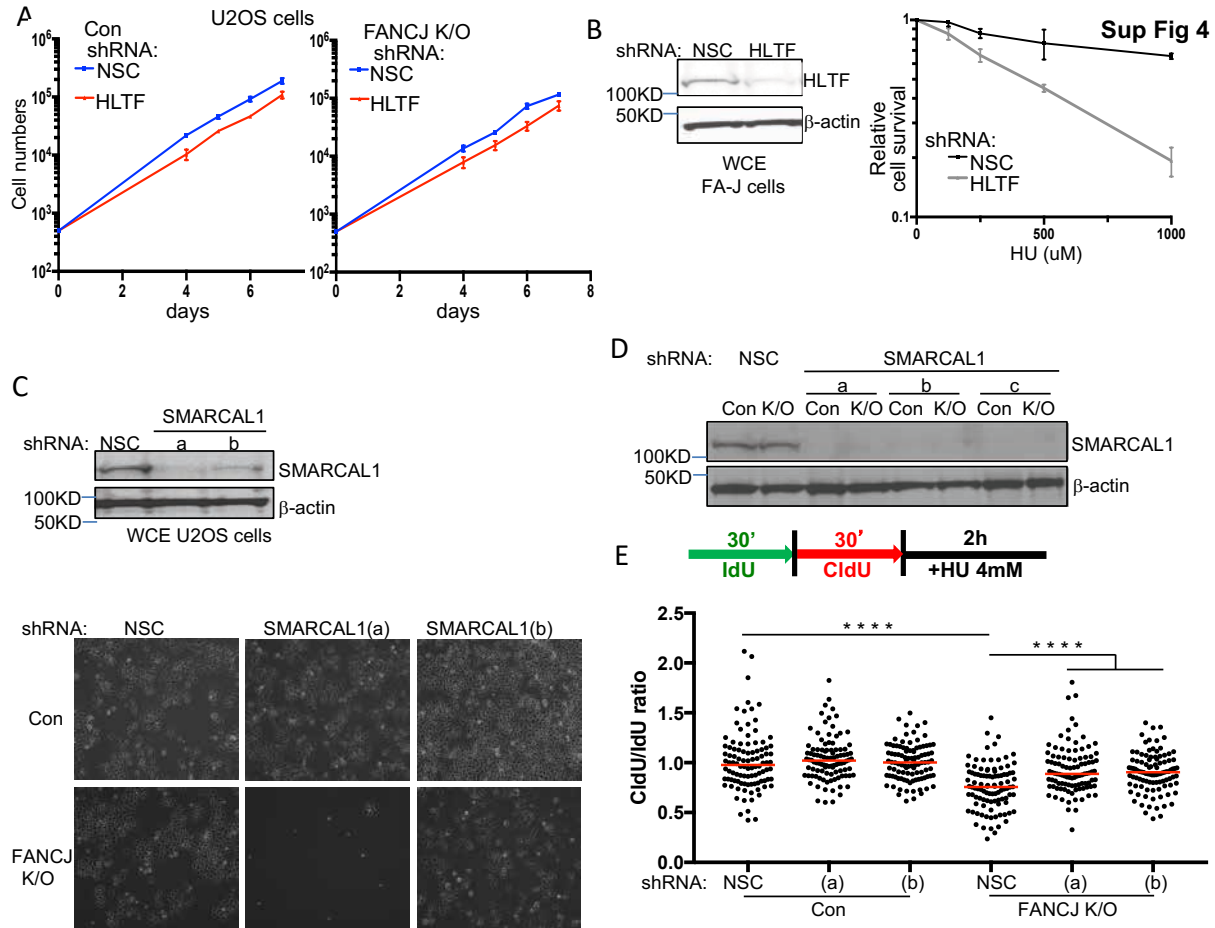

**Figure S4.** Growth dynamics and fork degradation in FANCD1 K/O U2OS, FA-J, or 293T K/O cells upon HLF1 or SMARCA1 depletion. Related to Figure 4. (A) FANCD1 K/O and control U2OS cells expressing shRNA against HLF1 or NSC were plated at low density, then collected and counted at indicated time. (B) Western blot analysis with the indicated Abs of lysates from FA-J cells expressing shRNA against HLF1 or NSC. Cell survival assays with FANCD1 null FA-J cells expressing shRNA against HLF1 or NSC under increasing concentrations of HU. Data represent the mean percent  $\pm$  s.d. of survival from three independent experiments. (C) Western blot analysis with the indicated Abs of lysates from control U2OS cells. Live cell imaging of FANCD1 K/O and control U2OS cells expressing shRNA (a) or (b) reagent to SMARCA1 or NSC following puromycin selection. (D) Western blot analysis with the indicated Abs of lysates from FANCD1 K/O and control 293T cells. (E) Schematic and quantification of CldU/IdU ratio after HU treatment. At least 100 fibers are quantified for each. Each dot represents one fiber; red bars represent the median. Statistical analysis according to two-tailed Mann-Whitney test; \*\*\*\*, P < 0.0001.

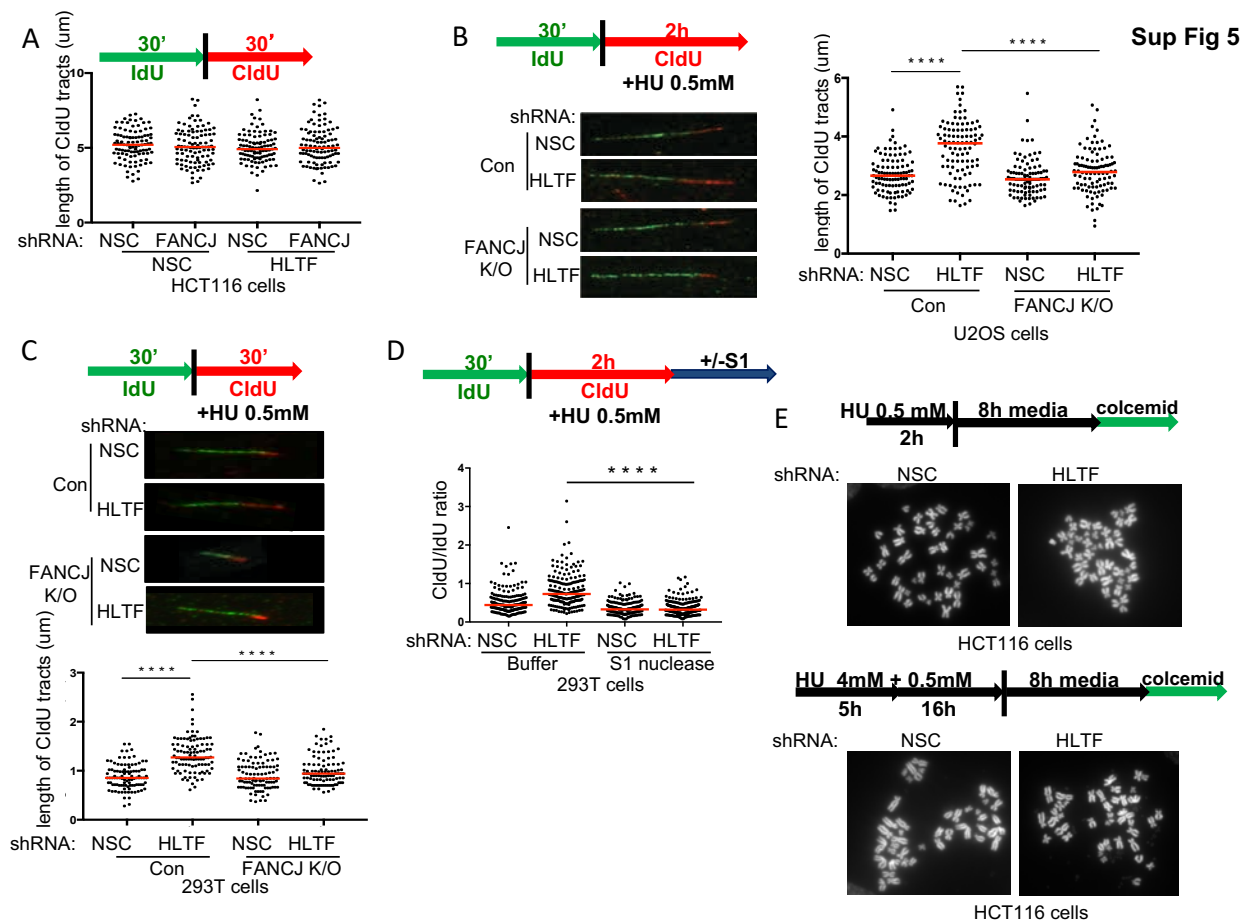

**Figure S5.** HLTF and FANCI loss do not alter fork progression in unchallenged conditions and FANCI contributes to unrestrained replication in HLTF depleted cells that leads to S1 nuclease sensitivity. Related to Figure 5. (A) Schematic and quantification of CldU tract length in HCT116 untreated cells with shRNA FANCI. (B) Schematic, representative images and quantification of CldU tract length during HU treatment in the indicated shRNA expressing U2OS cells. (C) Schematic, representative images and quantification of CldU tract length during HU treatment in the indicated shRNA expressing 293T cells. (D) Schematic and quantification of CldU to IdU ratio in the indicated shRNA expressing 293T cells, with or without S1 nuclease incubation. Each dot represents one fiber. At least 100 fibers are quantified for each. Red bars represent the median. Statistical analysis according to two-tailed Mann-Whitney test; \*\*\*\*,  $P < 0.0001$ . (E) Schematic and representative images of chromosome spreads from HU-treated HCT116 cells expressing the indicated shRNAs.

## Supplemental Table legends

Sup Table 1

|        |          |           |           |          |                 |          |            |           |           |           |         |
|--------|----------|-----------|-----------|----------|-----------------|----------|------------|-----------|-----------|-----------|---------|
| HELLS  | EEF1A1   | CROCC     | ZNF90     | HNRNPAB  | RAN             | RPSA     | HSPA1B     | DDX5      | HIST1H2AJ | SUMO3     | HP1BP3  |
| VIM    | PRSS3    | HIST1H2BI | HNRNPC    | HMGB1    | UBB             | ILF2     | NONO       | H2AFV     | PP1A      | RCC1      | RPL35A  |
| HNRNPD | THAP6    | HMGB3     | GAPDH     | DPYSL5   | LMNB1           | HNRNPA3  | HNRNPU     | KCTD12    | HNRNPA1   | ZNF236    | TUBB    |
| C2CD2L | PARP3    | SMARCA5   | ENO1      | OR10J4   | HIST1H1D        | ACTG1    | AHNAK      | HIST1H2BL | RACGAP1   | MYH14     | PCCA    |
| HSPA8  | TMPO     | KIF21B    | NPM1      | HIST1H1E | HIST1H1C        | EIF4A1   | ACACA      | CALML5    | HSP90AB1  | EEF2      | DNMT1   |
| CFL1   | IMPDH2   | H2AFY     | HIST2H2BE | TXN      | HSPA6;<br>HSPA7 | HNRNPK   | TRIM28     | H2AFY2    | PARP1     | H2AFX     | MYH9    |
| LRMP   | UHRF1BP1 | PSIP1     | H1FO      | HSPD1    | NCL             | HIST1H4A | HIST2H3PS2 | BAZ1B     | HIST2H3A  | HIST3H2BB | SHROOM3 |
| TUBA1C | ALDOA    | LDHA      | HSP90AA1  | TOP2A    | HNRNPA2B1       | RPS25    | HDGFRP2    | SUPT16H   | GTF2I     |           |         |

**Table S1:** Table of proteins found in Thymidine chase. Proteins in red were also found significant in iPOND (related to Figure 2D).
